# Supplementary material
Source: Springer Nature journal article supplement (https://www.springermedizin.de/resource/supplementary/13054_2013_3010_MOESM2_ESM.pdf/9712378)

**A**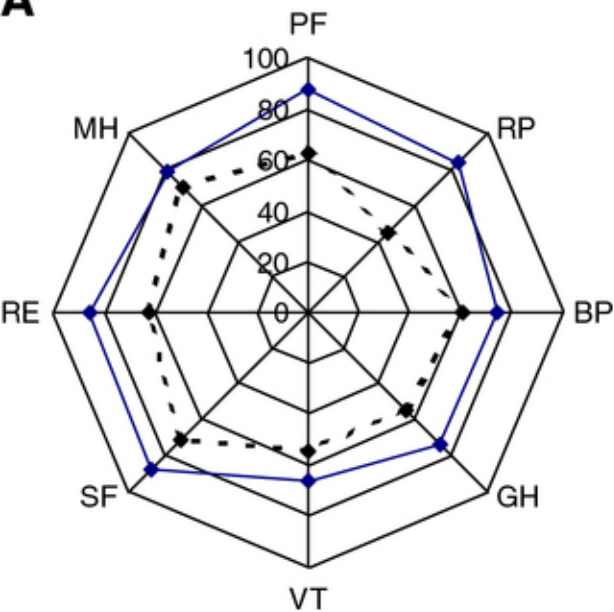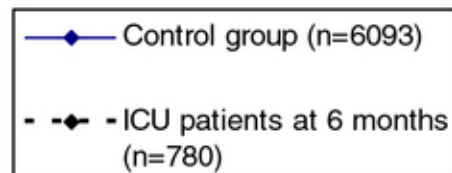**B**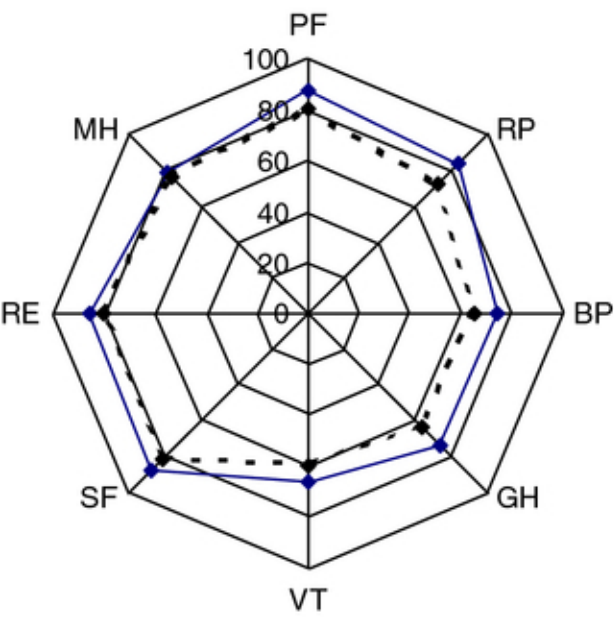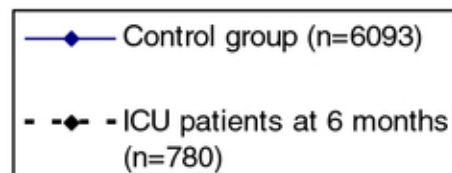

Supplement: MOESM2 [file 9712378]
